# Supplementary material
Source: PubMed Central journal article supplement (PMC3460421)
Supplement: supp_M112.356782_jbc.M112.356782-1.pdf [file supp_M112.356782_jbc.M112.356782-1.pdf]

Supplemental table 1.

UL8 mutants and replication phenotypes.

| UL8 mutants | UL8 amino acid residues changed to alanine | DNA Replication at 37C |
|-------------|--------------------------------------------|------------------------|
| A1          | E10, E11                                   | +++                    |
| A2          | R26, R28, E29                              | +++                    |
| A3          | R40                                        | +++                    |
| A4          | E45, R47, R49                              | +++                    |
| A6          | E59, R61, D62                              | +++                    |
| A7          | E90, E93                                   | +++                    |
| A8          | R99                                        | +++                    |
| A9          | E110, R111                                 | +++                    |
| A11         | E137, R138                                 | +++                    |
| A12         | R148                                       | +++                    |
| A13         | D159, D161                                 | +++                    |
| A14         | R168, E171                                 | +++                    |
| A15         | D174, R176                                 | +++                    |
| A16         | R181                                       | +++                    |
| A17         | R186, D187                                 | +++                    |
| A18         | R210, E211                                 | +++                    |
| A19         | K221, K222, E223                           | +++                    |
| A20         | D228, E231                                 | +++                    |
| A21         | E234, R238                                 | +++                    |
| A22         | R245, R249                                 | +++                    |
| A23         | R254, D255, D257                           | -                      |
| A24         | E264, K265                                 | +++                    |
| A25         | E299, E301, R303                           | +++                    |
| A26         | E328, R331                                 | +++                    |
| A27         | D332, R335                                 | +++                    |
| A28         | R378, E379                                 | +++                    |
| A29         | R383                                       | +++                    |
| A30         | K389                                       | +++                    |
| A31         | D395                                       | ++                     |
| A33         | D431, R435                                 | +++                    |
| A34         | R440, D442                                 | +++                    |
| A35         | E459, R460                                 | +++                    |
| A36         | E488, E489                                 | +++                    |
| A38         | D513, D516                                 | +++                    |
| A39         | E525, D526, R528, R529                     | +++                    |
| A41         | R545, R547                                 | +++                    |
| A42         | E555                                       | +++                    |
| A43         | R575, D576                                 | +++                    |

|     |                  |     |
|-----|------------------|-----|
| A44 | R599, D600       | +++ |
| A45 | R603, R604       | +++ |
| A46 | E615, E616, D617 | +++ |
| A47 | E626, D627       | +++ |
| A48 | D630, R631       | +++ |
| A49 | R640, D642, E644 | +/- |
| A51 | E654, D657       | +++ |
| A52 | D671, E673       | +   |
| A53 | R677, R678       | +   |
| A54 | D695, R699       | +++ |
| A55 | R713, E714       | +++ |
| A56 | R717, E718, E720 | +++ |
| A57 | E733, K736       | +++ |
| A58 | D742, D743, K744 | +++ |
